# Supplementary material for: A simultaneous thermal study in quantitative analysis of calcium oxalate hydrates
Source: Royal Society of Chemistry journal article supplement (doi:10.1039/c3ay41690a), 2013-01-01
Supplement: c3ay41690a.pdf [file c3ay41690a.pdf]

### Supplementary Data: Thermal test of COD and COM mixtures.

Preparation of COD and COM samples and TG measurements were described in Experimental section. Different amount of COD and COM crystals were mixed and subjected to TG measurements. Experimental data of 8 tests are listed in Table S1. Real COD contents were calculated based on their amounts in the mixtures (Formula S1). Observed COD contents were calculated based on Formula 3 proposed in the article (Formula S2). Deviation was calculated based on Formula S3.

$$\text{Real } C_{\text{COD}} = \frac{y}{x + y} \quad (\text{Formula S1})$$

$$\text{Observed } C_{\text{COD}} = \frac{1}{0.96} \times \left( \frac{\Delta w}{w1 + w2 - \Delta w} \times \frac{128}{18} - 1 \right) \quad (\text{Formula S2})$$

$$\text{Deviation} = \frac{\text{Observed } C_{\text{COD}} - \text{Real } C_{\text{COD}}}{\text{Real } C_{\text{COD}}} \quad (\text{Formula S3})$$

**Table S1. Thermal test of COD and COM mixtures.**

| Test | COD               |                       | COM               |                       | Mass deletion<br>$\Delta w$ (mg) | COD content (%)          |                              | Deviation (%) |
|------|-------------------|-----------------------|-------------------|-----------------------|----------------------------------|--------------------------|------------------------------|---------------|
|      | Mass<br>$w1$ (mg) | Amount<br>$y$ (mmole) | Mass<br>$w2$ (mg) | Amount<br>$x$ (mmole) |                                  | Real<br>$C_{\text{COD}}$ | Observed<br>$C_{\text{COD}}$ |               |
| 1    | 5.6               | 0.034                 | 18.7              | 0.128                 | 3.54                             | 21.0                     | 22.1                         | 5.2           |
| 2    | 5.8               | 0.035                 | 19.9              | 0.136                 | 3.75                             | 20.6                     | 22.4                         | 8.7           |
| 3    | 6.3               | 0.038                 | 20.9              | 0.143                 | 3.91                             | 21.2                     | 20.2                         | -4.6          |
| 4    | 6.3               | 0.038                 | 19.2              | 0.132                 | 3.7                              | 22.6                     | 21.6                         | -4.7          |
| 5    | 6.7               | 0.041                 | 15.6              | 0.107                 | 3.34                             | 27.7                     | 26.3                         | -4.8          |
| 6    | 8.6               | 0.052                 | 15.8              | 0.108                 | 3.78                             | 32.6                     | 31.6                         | -3.1          |
| 7    | 12.1              | 0.074                 | 22.8              | 0.156                 | 5.31                             | 32.1                     | 28.8                         | -10.4         |
| 8    | 13.2              | 0.080                 | 20.4              | 0.140                 | 5.38                             | 36.5                     | 37.1                         | 1.4           |
